# Supplementary material for: Transcriptional Regulation of Drug Metabolizing CYP Enzymes by Proinflammatory Wnt5A Signaling in Human Coronary Artery Endothelial Cells
Source: Frontiers journal article supplement (doi:10.3389/fphar.2021.619588), 2021-05-17
Supplement: Data_Sheet_1.pdf [file Data_Sheet_1.pdf]

***Supplementary Material*****Transcriptional regulation of drug metabolizing CYP enzymes by proinflammatory Wnt5A signaling in human coronary artery endothelial cells**

Tom Skaria<sup>1, 2</sup>, Esther Bachli<sup>3</sup>, Gabriele Schoedon<sup>1\*</sup>

<sup>1</sup>Inflammation Research Unit, Division of Internal Medicine, University Hospital Zürich, Zürich, Switzerland, <sup>2</sup>School of Biotechnology, National Institute of Technology Calicut, Kerala, India, <sup>3</sup>Department of Medicine, Uster Hospital, Uster, Switzerland.

\*Correspondence

Gabriele Schoedon

Email: klinso@usz.uzh.ch

## Supplementary Methods

### Supplementary Results

Supplementary Table 1. Genes regulated ( $\geq 2$  fold up or down) by 4 h Wnt5A treatment in HCAEC. Data are from 3 independent array experiments.

Supplementary Table 2. Substrate compounds of CYP1A1 and CYP1B1 retrieved from cytochrome P450 database SuperCYP (<http://bioinformatics.charite.de/supercyp/index.php?site=home>, accessed through ‘CYP-drug interaction’ on 03.08.2020), and SLCO2B1 substrates retrieved from metabolism and transport database Metrabase (<http://www-metrabase.ch.cam.ac.uk/>, accessed through ‘search by protein’ on 03.08.2020).

Supplementary Table 3. Genes regulated ( $\geq 2$  fold up or down) by 4 h Wnt5A/IL-1 $\beta$  combination treatment in HCAEC. Data are from 3 independent array experiments.

Supplementary Table 4. Regulated genes of drug and xenobiotic metabolism pathways significantly ( $P < 0.05$ ) enriched in 4 h Wnt5A+IL-1 $\beta$  transcriptome of HCAEC. Data are from 3 independent array experiments.

Supplementary Figure 1. Drug and xenobiotic metabolism pathways most significantly ( $P < 0.05$ ) regulated by 4 h IL-1 $\beta$  treatment in HCAEC. Pathways represented as histograms are ranked by the  $-\log$  value (P value). This figure is generated by reanalysing data published in Skaria, T., Bachli, E., and Schoedon, G. (2019). *Gene Ontology Analysis for Drug Targets of the Whole Genome Transcriptome of Human Vascular Endothelial Cells in Response to Proinflammatory IL-1*. *Frontiers in Pharmacology* 10. The purpose of reanalysing data from above-said study was to identify the myocardial drug and xenobiotic metabolism pathways regulated by 4 h IL-1 $\beta$  treatment (which was not contained in previous study) that served as an additional positive control for comparing the effects of Wnt5A/ IL-1 $\beta$  combination treatment with sole Wnt5A treatment in HCAEC.

## **Supplementary Methods**

### **Primary cell culture**

HCAEC (Cat. No. CC-2585, Clonetics, Lonza) were cultured in EGM-2MV Single Quots and 5% FBS (Clonetics, Lonza)-enriched EBM-2 medium (Clonetics, Lonza) in a Class 100 HEPA air filtered SteriCult system (Fisher Scientific, Switzerland) as described (Skaria et al., 2017; Skaria et al., 2019). HCAEC used in the present study were tested positively and functionally for CD31 (PECAM-1), CD105 (endoglin), von Willebrand Factor VIII, and acetylated low-density lipoprotein uptake as confirmed by the manufacturer (Lonza, Cell Systems). Masked low-level contamination in cultures were prevented by using antibiotic-free culture medium during the entire study period. Experiments were carried out using HCAEC from passages 3-6 only. HCAEC monolayers were treated with vehicle (sterile pyrogen free 0.1% human serum albumin in 0.9% NaCl) and recombinant human/mouse Wnt5A (250 ng/mL, Cat. No. 645-WN, R&D systems) alone or combined with recombinant human IL-1 $\beta$  (20 U/mL, Cat. No. 200-01B, PeproTech) for 4 h. All pipetting steps were carried out using Biopure ep Dualfilter T.I.P.S. sterile filter tips (Eppendorf) or TipOne aerosol barrier sterile filter pipet tips (USA Scientific).

### **Whole genome expression profiling and gene ontology analysis**

Differential gene expression analysis by competitive two-colour hybridization of cRNA probes onto 4 $\times$ 44K Human Whole Genome Oligonucleotide microarrays (Agilent Technologies) was conducted as described (Skaria et al., 2017; Skaria et al., 2019). Following isolation of total RNA using RNeasy Mini Kit (Qiagen, Basel, Switzerland), RNA was quantified by Nanodrop spectrophotometry. RNA integrity was measured with the Agilent 2100 Bioanalyzer System (Agilent Tech., Basel, Switzerland). Only RNA samples with a RNA integrity number (RIN) >9 were used for the microarray experiments. From each of treated samples, 500 ng of total RNA were subjected to reverse transcription and labelling with Cy3- and Cy5-CTP employing the two-colour Quick Amp Labelling Kit (Agilent Tech., Switzerland) comprising internal control probes and spike in's (labelled Spike A mix with Cy-3 and Spike B mix with Cy-5) to control reaction performance and background normalization of arrays. cRNA fragmentation and hybridization onto the Human GE 4 $\times$ 44K V2 Microarray chips were conducted in accordance with the Quick Amp Labelling protocol (Agilent Techno., version 5.7, 2008). Ozone-induced deterioration of cyanine dyes were avoided by washing then array chips with stabilization and drying solution (Agilent Tech., Switzerland). Scanning, feature extraction and pre-processing in conjunction with data normalization of the microarrays were conducted using the Microarray Scanner and Feature Extraction Software 10.7 (Agilent Tech. Inc.) employing default settings for Agilent 4 $\times$ 44 K two-colour arrays. Spot value normalization was performed with the default linear-lowess normalization. Log ratios and P value Log ratios, calculated based on extensive error model and pixel level statistics computed from the feature and background for each spot, were used to indicate significant differential regulation of genes of the whole transcriptome after linear-lowess normalization and provided in all microarray datasets deposited in NCBI GEO database (available with accession numbers GSE145987, GSE62281 and GSE146691).

The accession GSE145987, presented for the first time in this manuscript, contains 2 independent microarray experiments of HCAEC treated with Wnt5A for 4 h (2 independent replicates). The accession GSE146691, presented for the first time in this manuscript, contains 3 independent microarray experiments of HCAEC treated with Wnt5A/IL-1 combination for 4 h. The accession GSE62281 contains the third independent microarray data of HCAEC treated with Wnt5A for 4 h (third independent replicate). Of these three accession numbers, only the accession GSE62281 is associated with a previous publication (Skaria et al., 2017). However,

the aforesaid previous research article (Skaria et al., 2017) contained analysis/description of the microarray data set of only 8 h Wnt5A alone and 8 h IL-1 alone treatment of HCAEC along with several other experiments addressing the effects of chronic Wnt5A treatment on endothelial barrier function pathway. It has to be noted that though microarray data of single 4 h Wnt5A treatment experiment has been contained in the GSE62281, the aforesaid previous publication (Skaria et al., 2017) contained neither analysis nor description of the 4 h Wnt5A alone or combined Wnt5A/IL-1 microarray data. Furthermore, the aforesaid previous study (Skaria et al., 2017) did not involve any gene ontology analysis for the direct drug/ drug metabolising targets even for the 8 h Wnt5A- or 8 h combined Wnt5A/IL-1-treated whole genome transcriptome of HCAEC.

To identify genes that were consistently regulated  $\geq 2$ -fold in their expression in three independent microarray experiments in each treatment group, the pre-processed microarray data (that underwent linear-lowess normalization and error estimates) were further analysed using GeneSpring GX 9.0 Software (Agilent Tech. Inc.) with default settings for two-colour arrays. Genes regulated  $\geq 2$ -fold in their expression as found from the second line GeneSpring analysis (Supplementary Tables S1 and S3) were subjected to gene ontology analysis of drug and xenobiotic metabolising enzymes using Metacore GeneGO software version 6.32.69020 (Thomson Reuters, <http://portal.genego.com>) after setting a P value  $< 0.05$  and FDR cut off (0.05).

## References

- Skaria, T., Bachli, E., and Schoedon, G. (2017). Wnt5A/Ryk signaling critically affects barrier function in human vascular endothelial cells. *Cell Adh Migr* 11, 24-38.
- Skaria, T., Bachli, E., and Schoedon, G. (2019). Gene Ontology Analysis for Drug Targets of the Whole Genome Transcriptome of Human Vascular Endothelial Cells in Response to Proinflammatory IL-1. *Frontiers in Pharmacology* 10.

## **Supplementary Results**

**Supplementary Table 1.** Genes regulated ( $\geq 2$  fold up or down) by 4 h Wnt5A treatment in HCAEC. Data are from 3 independent array experiments.

| Upregulated genes | Downregulated genes |
|-------------------|---------------------|
| ALDH1L1           | A2ML1               |
| ATAD3C            | AATK                |
| C1orf172          | ABCB5               |
| C2CD4A            | ACOT6               |
| C6                | ACSM5               |
| CBLN4             | AIM2                |
| CEACAM21          | ALS2CR12            |
| CELA3A            | ANKRD30B            |
| CLCA2             | APOL6               |
| CNTN2             | ATXN3L              |
| CYP1A1            | BCL11A              |
| CYP1B1            | BCOR                |
| DDO               | BEST1               |
| DNM1L             | BHMT                |
| DSCR6             | BIN2                |
| EDNRA             | C10orf71            |
| EFCAB9            | C10orf81            |
| ELK1              | C12orf40            |
| ETV3              | C12orf54            |
| FAM90A7           | C12orf61            |
| FLJ10038          | C14orf23            |
| FLJ39080          | C14orf86            |
| GSG1              | C18orf34            |
| GYPE              | C1orf130            |
| HEATR1            | C1orf141            |
| HOMER1            | C1orf192            |
| HYALP1            | C1orf227            |
| IL22RA2           | C20orf71            |
| ITGA4             | C2orf72             |
| KCNS2             | C5orf60             |
| KCTD12            | C6orf112            |
| KIR3DL3           | C7orf66             |
| KRT24             | C7orf72             |
| LOC100130428      | C9orf66             |
| LOC100131702      | CAGE1               |
| LOC100507699      | CCL28               |
| LOC283588         | CCNC                |
| LOC440386         | CD200R1             |
| MAGEC2            | CDH23               |
| MIXL1             | CEACAM3             |
| MS4A2             | CHI3L1              |
| MYL10             | CHRM3               |
| MYO3A             | CHRNA4              |
| MYOD1             | CLDN19              |
| NEUROD2           | CLEC4M              |
| OR6Y1             | CLRN2               |
| OR8J1             | CMAHP               |
| PADI6             | CNKSR2              |
| PGC               | CSMD2               |
| POU5F2            | CTAGE5              |
| PSG5              | DAPL1               |
| PTAR1             | DCHS2               |
| PTCD3             | DCLK1               |
| PTPRC             | DEFB113             |
| RNASE6            | DKFZp547J222        |
| ROBO2             | DMGDH               |
| S100A14           | DNAH17              |
| SCARNA23          | DTHD1               |
| SGCD              | EDNRB               |

SHANK2  
 SHISA2  
 SLA  
 SLC10A7  
 SLC16A2  
 SLC24A4  
 SLC39A12  
 SLC4A5  
 SLCO2B1  
 TBX21  
 TDRD6  
 TLE1  
 TMEM31  
 TTC30A  
 UMODL1  
 VIT  
 ZNF780A  
 ZRANB3

EIF3E  
 ENO4  
 EPAG  
 EPO  
 F13A1  
 FABP12  
 FAM163A  
 FBP2  
 FGF16  
 FHAD1  
 FLJ46120  
 FMN2  
 FRY  
 FSTL4  
 GAFA1  
 GATA4  
 GCNT3  
 GCNT7  
 GFAP  
 GFRAL  
 GNAO1  
 GPR6  
 GPR77  
 GRIP2  
 GUCY2C  
 HIST1H2BA  
 HMCN2  
 HNF4A  
 HOXD9  
 HPGD  
 HPSE2  
 HSPB7  
 IGF2  
 IKZF1  
 IL16  
 IL2  
 IL31  
 ISL2  
 ITGAD  
 ITGB6  
 KAZN  
 KCNV1  
 KIAA1875  
 KLHL15  
 KLK12  
 KRTAP19-4  
 KRTAP7-1  
 LAIR2  
 LILRB4  
 LIPC  
 LOC100128077  
 LOC100128164  
 LOC100128356  
 LOC100128402  
 LOC100129072  
 LOC100129119  
 LOC100129413  
 LOC100130157  
 LOC100130255  
 LOC100130452  
 LOC100130701  
 LOC100130849  
 LOC100131581  
 LOC100132147  
 LOC100132738  
 LOC100144597  
 LOC100289333

|  |              |
|--|--------------|
|  | LOC100291323 |
|  | LOC100507634 |
|  | LOC128322    |
|  | LOC150568    |
|  | LOC150935    |
|  | LOC220980    |
|  | LOC285370    |
|  | LOC285778    |
|  | LOC286190    |
|  | LOC339862    |
|  | LOC401433    |
|  | LOC440117    |
|  | LOC442028    |
|  | LOC494558    |
|  | LOC554201    |
|  | LOC645591    |
|  | LOC646034    |
|  | LOC728084    |
|  | LOC728192    |
|  | LOC729177    |
|  | LOC729444    |
|  | LOC90834     |
|  | LOC91149     |
|  | LPHN3        |
|  | LRRTM2       |
|  | MAGEB5       |
|  | MCHR2        |
|  | MCTP2        |
|  | MFSD6L       |
|  | MGC12916     |
|  | MNDA         |
|  | MUC12        |
|  | MYBL1        |
|  | MYOCD        |
|  | NCRNA00264   |
|  | NCRNA00284   |
|  | NCRNA00307   |
|  | NDUFS7       |
|  | NEB          |
|  | NHLH1        |
|  | NPIPL3       |
|  | NT5DC4       |
|  | NTNG1        |
|  | ODF2L        |
|  | OPN5         |
|  | OR4C16       |
|  | OR4D2        |
|  | OR4F4        |
|  | OR6C76       |
|  | OR9G4        |
|  | PABPC1P2     |
|  | PIAS4        |
|  | PLB1         |
|  | PLCH1        |
|  | PLP1         |
|  | POM121L1P    |
|  | POPDC2       |
|  | PPP1R1C      |
|  | PRAMEF13     |
|  | PROZ         |
|  | PRPS1        |
|  | PSG9         |
|  | RAD9B        |
|  | RGR          |
|  | RUNX2        |
|  | SAMD12       |
|  | SASH1        |

|  |                                                                                                                                                                                                                                                                                                                                                                                                                                                                                                               |
|--|---------------------------------------------------------------------------------------------------------------------------------------------------------------------------------------------------------------------------------------------------------------------------------------------------------------------------------------------------------------------------------------------------------------------------------------------------------------------------------------------------------------|
|  | SCNN1A<br>SEC14L3<br>SEMG2<br>SERPINI2<br>SFTPB<br>SHCBP1L<br>SLC14A1<br>SLC3A1<br>SNAR-C3<br>SNORA2B<br>SNORA77<br>SPANXB2<br>SPINT4<br>SST<br>ST8SIA6<br>STAP1<br>SULT1C2<br>SYCP2L<br>SYT6<br>TARP<br>TCEB3C<br>TCTN3<br>TDRD5<br>TFAP2D<br>THUMPD2<br>TIMP1<br>TPTE2<br>TRAF3IP3<br>TRAPPC10<br>TRIOBP<br>TRPM6<br>TTY21<br>TTY3<br>TTY8<br>TUBBP5<br>TXNRD3NB<br>UBASH3A<br>UBE2D3<br>UBE4B<br>UGT1A4<br>UGT1A6<br>USH2A<br>WIPF3<br>ZBP1<br>ZCCHC11<br>ZNF167<br>ZNF354C<br>ZNF853<br>ZNF883<br>ZSCAN5B |
|--|---------------------------------------------------------------------------------------------------------------------------------------------------------------------------------------------------------------------------------------------------------------------------------------------------------------------------------------------------------------------------------------------------------------------------------------------------------------------------------------------------------------|



**Supplementary Table 2.** Substrate compounds of CYP1A1 and CYP1B1 retrieved from cytochrome P450 database SuperCYP (<http://bioinformatics.charite.de/supercyp/index.php?site=home>, accessed through ‘CYP-drug interaction’ on 03.08.2020), and SLCO2B1 substrates retrieved from metabolism and transport database Metrabase (<http://www-metabase.ch.cam.ac.uk/>, accessed through ‘search by protein’ on 03.08.2020).

| Enzyme/<br>transporter | CYP1A1                                                                                                                                                                                                                                                                                                                                                                                                                                                                                                                                                                                                                                                                                                                                                                           | CYP1B1                                                                                                                                                                                                                                                                | SLCO2B1                                                                                                                                                                                                                                                                                                                                                                                                                                                                                                                                                                                                                                                                                                                                                                                                                                                                                                                                                                                                                                                                                                                                                                                                        |
|------------------------|----------------------------------------------------------------------------------------------------------------------------------------------------------------------------------------------------------------------------------------------------------------------------------------------------------------------------------------------------------------------------------------------------------------------------------------------------------------------------------------------------------------------------------------------------------------------------------------------------------------------------------------------------------------------------------------------------------------------------------------------------------------------------------|-----------------------------------------------------------------------------------------------------------------------------------------------------------------------------------------------------------------------------------------------------------------------|----------------------------------------------------------------------------------------------------------------------------------------------------------------------------------------------------------------------------------------------------------------------------------------------------------------------------------------------------------------------------------------------------------------------------------------------------------------------------------------------------------------------------------------------------------------------------------------------------------------------------------------------------------------------------------------------------------------------------------------------------------------------------------------------------------------------------------------------------------------------------------------------------------------------------------------------------------------------------------------------------------------------------------------------------------------------------------------------------------------------------------------------------------------------------------------------------------------|
| Substrates             | Acriflavinium-chloride<br>Alum<br>Amiodarone<br>Amodiaquine<br>Benzydamine<br>Capsaicin<br>Chloroquine<br>Cinnarizine<br>Clenbuterol<br>Dacarbazine<br>Daunorubicin<br>Debrisoquine<br>Decamethrin<br>Diclofenac<br>Dronabinol<br>Erythromycin<br>Estradiol<br>Estrone<br>Etacrynic acid<br>Ethinylestradiol<br>Flunarizine<br>Flutamide<br>Fluvastatin<br>Granisetron<br>Haloperidol<br>Ipriflavone<br>Levothyroxine- sodium<br>Melatonin<br>Menadione<br>Mercaptopurine<br>Nicotine<br>Nitrofurantoin<br>Omeprazole<br>Oxaliplatin<br>Paracetamol<br>Perazine<br>Phenacetin<br>Prazosin<br>Procarbazine<br>Progesterone<br>Raltegravir<br>Retigabine<br>Riboflavin (vit B2)<br>Riluzole<br>Tamoxifen<br>Testosterone<br>Theophylline<br>Toremifene<br>Troglitazone<br>Zotepine | Amodiaquine<br>Caffeine<br>Dibutylphthalate<br>Docetaxel<br>Erythromycin<br>Estradiol<br>Estrone<br>Flutamide<br>Hydrogen-<br>peroxide<br>Melatonin<br>Oxaliplatin<br>Procarbazine<br>Progesterone<br>Retinol (vit A)<br>Rosuvastatin<br>Testosterone<br>Theophylline | Dinoprostone<br>Penicillin G<br>Bromosulphophthalein disodium<br>Estrone-3-sulfate<br>Dehydroepiandrosterone sulfate<br>Taurocholic acid<br>Pravastatin<br>Glyburide<br>Pregnenolone sulfate<br>Aliskiren<br>Pemetrexed<br>Fluvastatin<br>Bosentan<br>Etoposide<br>Methanone, [4-[4-(3,4-dihydro-6,7-dimethoxy-2(1H)-isoquinoliny)]-6,7-dimethoxy-2-quinazoliny]]hexahydro-1H-1,4-diazepin-1-yl]](3,4-dihydroxy-1-pyrrolidiny)]<br>Rocuronium<br>N-methyl-quinidine<br>Digoxin<br>Pitavastatin<br>Atorvastatin<br>Telmisartan<br>Rosuvastatin<br>CP 671305<br>M17055<br>Telmisartan glucuronide<br>Levothyroxine<br>Talinolol<br>Tebipenem pivoxil<br>BDE 47<br>BDE99<br>BDE153<br>Bromosulphophthalein<br>Latanoprost acid<br>Salozinal<br>3-Pyridinecarboxylic acid, 6-[[[(2S)-3-cyclopentyl-1-oxo-2-[4-(trifluoromethyl)-1H-imidazol-1-yl]propyl]amino]-<br>ethinylestradiol-3-O-sulfate<br>Cerivastatin<br>Montelukast<br>Sulfasalazine<br>Fexofenadine<br>Eltrombopag<br>(betaR,deltaR)-5-cyclopropyl-2-(4-fluorophenyl)-4-[[[(3-fluorophenyl)methyl]amino]carbonyl]-beta,delta-dihydroxy-1H-imidazole-1-heptanoic acid<br>Unoprostone carboxylate<br>Ezetimibe glucuronide<br>Iloprost<br>Thromboxane B2 |

|  |  |  |                                                                            |
|--|--|--|----------------------------------------------------------------------------|
|  |  |  | Scutellarein 6-O-beta-D-glucuronide<br>Scutellarein 7-O-beta-D-glucuronide |
|--|--|--|----------------------------------------------------------------------------|

**Supplementary Table 3.** Genes regulated ( $\geq 2$  fold up or down) by 4 h Wnt5A/IL-1 $\beta$  combination treatment in HCAEC. Data are from 3 independent array experiments.

| Upregulated genes | Downregulated genes |
|-------------------|---------------------|
| ABTB2             | A2ML1               |
| ADAM21            | ACOT6               |
| ADAMTS9           | ACSM5               |
| AGMO              | ADRB1               |
| AMOT              | AGBL2               |
| AMPD3             | AJAP1               |
| APOBEC3G          | AKNA                |
| APOL2             | ALDOAP2             |
| APOL3             | ANK3                |
| APOL4             | ANKRD20A2           |
| APOL6             | ANKRD20A9P          |
| ARHGAP9           | ANKRD23             |
| ARID5B            | ANKRD5              |
| ATF3              | ANXA11              |
| ATP2C2            | AQP9                |
| ATPBD4            | ARHGAP18            |
| BARHL1            | ARHGEF4             |
| BATF3             | BCL11A              |
| BCL2A1            | BEST1               |
| BCL6              | BIN2                |
| BDKRB2            | C10orf99            |
| BHLHE41           | C12orf54            |
| BICC1             | C13orf15            |
| BIRC3             | C14orf23            |
| BMP2              | C18orf34            |
| C10orf93          | C1orf141            |
| C11orf40          | C1orf229            |
| C11orf96          | C5orf52             |
| C12orf50          | C5orf62             |
| C12orf53          | C7orf58             |
| C14orf28          | C9orf66             |
| C15orf48          | CACNA1G             |
| C19orf29OS        | CAGE1               |
| C1orf172          | CCDC108             |
| C1QTNF1           | CCDC121             |
| C1R               | CCDC165             |
| C1S               | CCDC48              |
| C22orf33          | CCNC                |
| C2CD4A            | CDC14B              |
| C2CD4B            | CDCA7L              |
| C3                | CEACAM7             |
| C3orf52           | CES1P1              |
| C6                | CH25H               |
| C6orf58           | CLEC4GP1            |
| C7orf51           | CMAHP               |
| C8orf4            | CNIH3               |
| C8orf80           | COL22A1             |
| CACNA1B           | COX7B2              |
| CAMTA1            | CSMD2               |
| CBLN4             | CXorf22             |
| CBR3              | CXorf51             |
| CCL1              | CYP26B1             |
| CCL17             | DCHS2               |
| CCL2              | DDIT4L              |
| CCL20             | DEFB113             |
| CCL3              | DLL4                |
| CCL3L3            | DNAJB4              |
| CCL4              | DNALI1              |
| CCL5              | DPP6                |
| CCL7              | DSPP                |
| CCL8              | E2F2                |

|         |              |
|---------|--------------|
| CCRN4L  | E2F8         |
| CD69    | EBF1         |
| CD7     | EFCAB11      |
| CD70    | EHD3         |
| CD83    | EIF3E        |
| CDHR3   | ENAH         |
| CFB     | EPHA5        |
| CHDH    | EPN3         |
| CHP2    | EVI2B        |
| CHRD12  | FAM124B      |
| CHRNA2  | FAM201A      |
| CHST6   | FAM26D       |
| CITED4  | FAM74A1      |
| CLDN1   | FGF12        |
| CLDN14  | FGFBP3       |
| CLEC2D  | FGFR2        |
| CLEC4A  | FILIP1       |
| CNOT4   | FLG2         |
| CNTN2   | FLJ25328     |
| COL27A1 | FLJ41484     |
| CPEB4   | FRY          |
| CRIP1   | GATA4        |
| CSF1    | GFOD1        |
| CSF2    | GIMAP7       |
| CSF3    | GJA4         |
| CSRP2   | GKN2         |
| CTHRC1  | GLIPR1L2     |
| CTSL1   | GNG2         |
| CX3CL1  | GOLGA7B      |
| CXCL1   | GPC6         |
| CXCL10  | GPR116       |
| CXCL2   | H2AFB3       |
| CXCL3   | HOXB7        |
| CXCL5   | HRCT1        |
| CXCL6   | HS3ST1       |
| CXCR7   | HS6ST3       |
| CYLD    | HTR1D        |
| CYP1A1  | HYDIN        |
| CYP1B1  | ICA1L        |
| CYP7A1  | IGSF6        |
| CYS1    | IL16         |
| DCUN1D2 | INHBB        |
| DDX58   | ISL1         |
| DENND2D | KCNC2        |
| DIO3    | KHK          |
| DISC1   | KIAA1239     |
| DLG2    | KIF2B        |
| DNAJB9  | LDB2         |
| DNM1L   | LHX9         |
| DRAM1   | LILRB4       |
| DSCR6   | LOC100128402 |
| DUSP16  | LOC100129413 |
| EBI3    | LOC100129518 |
| EDNRA   | LOC100130849 |
| EFNA1   | LOC100131023 |
| EGFL6   | LOC100131395 |
| EGOT    | LOC100131581 |
| EGR2    | LOC100132147 |
| EGR3    | LOC100507012 |
| EGR4    | LOC100510059 |
| ELOVL7  | LOC158376    |
| ENKUR   | LOC282980    |
| ERC2    | LOC284080    |
| ERO1LB  | LOC285954    |
| ETV3    | LOC286068    |
| ETV7    | LOC286071    |
| F3      | LOC286367    |

|            |            |
|------------|------------|
| FAM101A    | LOC340094  |
| FAM122C    | LOC400927  |
| FAM129A    | LOC400958  |
| FAM129C    | LOC401847  |
| FAM150B    | LOC440117  |
| FAM201B    | LOC441179  |
| FAM71F2    | LOC729156  |
| FCGR2A     | LOC729444  |
| FCRL2      | LOC90834   |
| FER1L6-AS1 | LOC91149   |
| FGF18      | LRRTM2     |
| FGL1       | LYPD1      |
| FILIP1L    | MAP7       |
| FLJ25363   | MBP        |
| FLJ31104   | MCF2L      |
| FOXF1      | MCHR2      |
| FOXJ1      | MDFI       |
| FSTL3      | MEF2C      |
| G0S2       | MNDA       |
| GBP1       | MTUS1      |
| GBP3       | MUC12      |
| GBP4       | MYCN       |
| GBP5       | NCRNA00284 |
| GCH1       | NCRNA00320 |
| GFPT2      | NEB        |
| GK         | NFIB       |
| GOT1L1     | NPIPL3     |
| GPR37L1    | NTNG1      |
| GPR68      | ODF2L      |
| GRAMD3     | OR2K2      |
| GRK1       | OR2T12     |
| GRM4       | OR5L1      |
| HAS3       | OR9G4      |
| HBS1L      | OTX1       |
| HCG4B      | OVOS2      |
| HERC6      | PALMD      |
| HEY1       | PAQR4      |
| HGF        | PARP15     |
| HIVEP2     | PCDH11X    |
| HLA-B      | PCDH15     |
| HLA-C      | PLAC8      |
| HLA-F      | PLB1       |
| HOMER1     | PLEKHG4B   |
| ICAM1      | PPFIBP2    |
| ICAM4      | PRB4       |
| ICAM5      | PRICKLE1   |
| ICOSLG     | PRO0611    |
| IDO1       | PRO1596    |
| IER3       | PRO1768    |
| IFI30      | PRODH      |
| IFIH1      | PRPS1      |
| IFIT5      | RASGRP3    |
| IFNGR1     | RASSF5     |
| IFNGR2     | RASSF9     |
| IL10RA     | RD3        |
| IL15       | RESP18     |
| IL15RA     | RFX4       |
| IL18R1     | RIN1       |
| IL18RAP    | SAMD13     |
| IL1A       | SEC14L3    |
| IL1B       | SEMG2      |
| IL22RA2    | SERTAD4    |
| IL27       | SFTPB      |
| IL36G      | SGCD       |
| IL6        | SGK223     |
| IL8        | SH3BP4     |
| INHBA      | SH3TC2     |

|              |         |
|--------------|---------|
| IQCA1        | SHE     |
| IRAK2        | SIRPD   |
| IRF1         | SKOR1   |
| IRX2         | SLC22A2 |
| ISG20        | SLC4A10 |
| ITGA1        | SMAD6   |
| ITGA4        | SNAP91  |
| JAM2         | SNTG1   |
| KCNE4        | SOX18   |
| KCNN2        | SPANXN3 |
| KDM6B        | SPIC    |
| KIAA0247     | SRRM3   |
| KIAA1644     | ST8SIA4 |
| KIRREL2      | ST8SIA6 |
| KLF6         | SULT1C2 |
| KLK3         | SYNPO2  |
| KRT24        | TBX1    |
| KRTAP3-2     | TEX15   |
| KYNU         | THBD    |
| LAD1         | TMC1    |
| LAMB3        | TMEM100 |
| LAMC2        | TPD52L1 |
| LIF          | TRIM36  |
| LITAF        | TTN     |
| LOC100128126 | TTY21   |
| LOC100128262 | TUBB1   |
| LOC100128371 | TUBBP5  |
| LOC100128869 | WDFY4   |
| LOC100129104 | WWTR1   |
| LOC100131733 | XKR4    |
| LOC100507410 | YIF1B   |
| LOC148145    | ZCCHC11 |
| LOC283352    | ZDHC15  |
| LOC283922    | ZNF30   |
| LOC284263    | ZNF365  |
| LOC284570    | ZNF367  |
| LOC285972    | ZNF395  |
| LOC393076    |         |
| LOC440896    |         |
| LOC642620    |         |
| LOC646999    |         |
| LOC728228    |         |
| LOC728752    |         |
| LTB          |         |
| LYPD6        |         |
| LYSMD3       |         |
| MAGEC2       |         |
| MAN1B1       |         |
| MAP3K8       |         |
| MCM9         |         |
| MDGA1        |         |
| MIR155HG     |         |
| MMP1         |         |
| MMP10        |         |
| MRGPRX3      |         |
| MS4A2        |         |
| MSX1         |         |
| MTHFD2L      |         |
| MTMR7        |         |
| MUC4         |         |
| MYB          |         |
| MYOM1        |         |
| N4BP2L1      |         |
| NAB1         |         |
| NAMPT        |         |
| NCOA7        |         |
| NEURL3       |         |

|                                                                                                                                                                                                                                                                                                                                                                                                                                                                                                                                                                                                                                           |  |
|-------------------------------------------------------------------------------------------------------------------------------------------------------------------------------------------------------------------------------------------------------------------------------------------------------------------------------------------------------------------------------------------------------------------------------------------------------------------------------------------------------------------------------------------------------------------------------------------------------------------------------------------|--|
| NFKB1<br>NFKBIA<br>NFKBID<br>NFKBIZ<br>NINJ1<br>NIPAL4<br>NKAIN1<br>NKD2<br>NKX3-1<br>NNMT<br>NOD2<br>NPTX1<br>NR4A3<br>NR6A1<br>NRIP1<br>NTN1<br>NUAK2<br>NUP62CL<br>NUPL1<br>OR10H1<br>OR11H12<br>OR1F1<br>OR2M2<br>OR5M11<br>OR5P2<br>OSGIN2<br>OXTR<br>P2RY6<br>PARD3<br>PARP14<br>PDE4DIP<br>PDE5A<br>PDGFRA<br>PDLIM4<br>PDPR<br>PDZD2<br>PEG10<br>PELI1<br>PGR<br>PITPNC1<br>PITX2<br>PLA1A<br>PLA2G4A<br>PLCB4<br>POU5F2<br>PPAP2B<br>PRINS<br>PRRX1<br>PSMD5<br>PTGFR<br>PTGS2<br>PTPRC<br>PTX3<br>RAB11FIP4<br>RASGRP1<br>RASSF3<br>RC3H1<br>RCAN1<br>RCSD1<br>REL<br>RELB<br>RFPL4B<br>RGS16<br>RGS2<br>RIPK2<br>RLBP1<br>RND1 |  |
|-------------------------------------------------------------------------------------------------------------------------------------------------------------------------------------------------------------------------------------------------------------------------------------------------------------------------------------------------------------------------------------------------------------------------------------------------------------------------------------------------------------------------------------------------------------------------------------------------------------------------------------------|--|

|                                                                                                                                                                                                                                                                                                                                                                                                                                                                                                                                                                                                                                                                               |  |
|-------------------------------------------------------------------------------------------------------------------------------------------------------------------------------------------------------------------------------------------------------------------------------------------------------------------------------------------------------------------------------------------------------------------------------------------------------------------------------------------------------------------------------------------------------------------------------------------------------------------------------------------------------------------------------|--|
| RNF157<br>RRAD<br>RSPO3<br>RTP4<br>RUNX1<br>S100A3<br>SAMD4A<br>SAMD9L<br>SAT1<br>SAV1<br>SDC4<br>SEC24A<br>SELE<br>SEMA3C<br>SERPINA3<br>SERPINB13<br>SERPINB2<br>SERPINE2<br>SGPP2<br>SHANK2<br>SLC10A7<br>SLC12A7<br>SLC19A2<br>SLC22A24<br>SLC2A6<br>SLC30A3<br>SLC41A2<br>SLC44A3<br>SLC6A4<br>SLC7A2<br>SLC8A3<br>SLC9A4<br>SLCO4A1<br>SLCO5A1<br>SNORA60<br>SNX3<br>SOCS1<br>SOD2<br>SOX3<br>SPINLW1<br>SPON2<br>SQRDL<br>SRD5A2<br>SSU72<br>ST6GAL1<br>ST8SIA2<br>STAT5A<br>STC2<br>STON2<br>SYT9<br>TAP1<br>TAS2R39<br>TCHH<br>TFAP2A<br>TGFB3<br>THSD7B<br>TIAM2<br>TIFA<br>TLR2<br>TM4SF4<br>TMC02<br>TMEM106A<br>TMEM146<br>TMEM217<br>TMEM37<br>TMEM71<br>TMEM72 |  |
|-------------------------------------------------------------------------------------------------------------------------------------------------------------------------------------------------------------------------------------------------------------------------------------------------------------------------------------------------------------------------------------------------------------------------------------------------------------------------------------------------------------------------------------------------------------------------------------------------------------------------------------------------------------------------------|--|



|                                                                                                                                                                                                                                                                                                                                   |  |
|-----------------------------------------------------------------------------------------------------------------------------------------------------------------------------------------------------------------------------------------------------------------------------------------------------------------------------------|--|
| TNF<br>TNFAIP2<br>TNFAIP3<br>TNFAIP6<br>TNFAIP8<br>TNFRSF11B<br>TNFRSF9<br>TNFSF10<br>TNFSF15<br>TNFSF9<br>TNIP1<br>TNIP3<br>TPPP<br>TRAF1<br>TRIM36<br>TSLP<br>TTC30A<br>TTC39A<br>UBD<br>UBR4<br>UGCG<br>UMODL1<br>UPP1<br>VCAM1<br>VEGFA<br>VIPR2<br>VSTM1<br>WNT7B<br>WTAP<br>ZC3H12A<br>ZC3H12C<br>ZDHHC23<br>ZFR2<br>ZNF785 |  |
|-----------------------------------------------------------------------------------------------------------------------------------------------------------------------------------------------------------------------------------------------------------------------------------------------------------------------------------|--|

**Supplementary Table 4.** Regulated genes of drug and xenobiotic metabolism pathways significantly ( $P < 0.05$ ) enriched in 4 h Wnt5A+IL-1 $\beta$  transcriptome of HCAEC. Data are from 3 independent array experiments.

| Gene symbol                 | Protein name                                                      | Class                         | Regulation |
|-----------------------------|-------------------------------------------------------------------|-------------------------------|------------|
| †ABTB2 <sup>a</sup>         | Ankyrin repeat and BTB/POZ domain containing protein 2            | Generic binding protein       | Up         |
| †AMPD3 <sup>a</sup>         | AMP deaminase 3                                                   | Generic enzyme                | Up         |
| †AQP9 <sup>e</sup>          | Aquaporin-9                                                       | Generic channel               | Down       |
| †BCL2A1 <sup>a</sup>        | Bcl-2-related protein A1                                          | Generic binding protein       | Up         |
| †BDKRB2 <sup>a,b,c</sup>    | B2 bradykinin receptor                                            | GPCR                          | Up         |
| †C1R <sup>b</sup>           | Complement C1r subcomponent                                       | Generic protease              | Up         |
| †C1S <sup>b</sup>           | Complement C1s subcomponent                                       | Generic protease              | Up         |
| †C3 <sup>b</sup>            | Complement C3                                                     | Generic binding protein       | Up         |
| †CACNA1B <sup>a</sup>       | Voltage-dependent N-type calcium channel subunit alpha-1B         | Voltage-gated ion-channel     | Up         |
| CCL1 <sup>a</sup>           | C-C motif chemokine 1                                             | Receptor ligand               | Up         |
| †CCL2 <sup>a,c</sup>        | C-C motif chemokine 2                                             | Receptor ligand               | Up         |
| †CCL20 <sup>a</sup>         | C-C motif chemokine 20                                            | Receptor ligand               | Up         |
| †CCL4 <sup>a</sup>          | C-C motif chemokine 4                                             | Receptor ligand               | Up         |
| †CCL5 <sup>a</sup>          | C-C motif chemokine 5                                             | Receptor ligand               | Up         |
| CCL7 <sup>a</sup>           | C-C motif chemokine 7                                             | Receptor ligand               | Up         |
| †CCL8 <sup>b</sup>          | C-C motif chemokine 8                                             | Receptor ligand               | Up         |
| †CFB <sup>b</sup>           | Complement factor B                                               | Generic protease              | Up         |
| COX7B2 <sup>a,b</sup>       | Cytochrome c oxidase subunit 7B2, mitochondrial                   | Generic enzyme                | Down       |
| CSF2 <sup>b</sup>           | Granulocyte-macrophage colony-stimulating factor                  | Receptor ligand               | Up         |
| †CSF3 <sup>b</sup>          | Granulocyte-macrophage colony-stimulating factor                  | Receptor ligand               | Up         |
| †CTSL <sup>b</sup>          | Cathepsin L1                                                      | Generic protease              | Up         |
| †CXCL10 <sup>b</sup>        | C-X-C motif chemokine 10                                          | Receptor ligand               | Up         |
| *†CYP1A1 <sup>a,c,f,g</sup> | Cytochrome P450 1A1                                               | Generic enzyme                | Up         |
| ≠†CYP7A1 <sup>b,c,d,f</sup> | Cytochrome P450 7A1                                               | Generic enzyme                | Up         |
| †CYP1B1 <sup>a,b,g</sup>    | Cytochrome P450 1B1                                               | Generic enzyme                | Up         |
| DCHS2 <sup>a</sup>          | Protocadherin-23                                                  | Generic binding protein       | Down       |
| †DNALI1 <sup>b</sup>        | Axonemal dynein light intermediate polypeptide 1                  | Generic binding protein       | Down       |
| EBI3 <sup>a</sup>           | Interleukin-27 subunit beta                                       | Receptor ligand               | Up         |
| *†EDNRA <sup>a,b,c</sup>    | Endothelin-1 receptor                                             | GPCR                          | Up         |
| †EFNA1 <sup>b</sup>         | Ephrin-A1                                                         | Receptor ligand               | Up         |
| ≠†EPHA5 <sup>c</sup>        | Ephrin type-A receptor 5                                          | Receptor with enzyme activity | Down       |
| †FCGR2A <sup>a</sup>        | Low affinity immunoglobulin gamma Fc region receptor II-a         | Generic receptor              | Up         |
| †FILIP1L <sup>b</sup>       | Filamin A-interacting protein 1-like                              | Generic protein               | Up         |
| †GBP1 <sup>a,b</sup>        | Guanylate-binding protein 1                                       | Generic binding protein       | Up         |
| †GCH1 <sup>a</sup>          | GTP cyclohydrolase 1                                              | Generic enzyme                | Up         |
| ≠†GNG2 <sup>a,b</sup>       | Guanine nucleotide-binding protein G(I)/G(S)/G(O) subunit gamma-2 | G beta/gamma                  | Down       |
| †GPR37L1 <sup>a,b,c</sup>   | G-protein coupled receptor 37-like 1                              | GPCR                          | Up         |
| ≠†HOXB7 <sup>a</sup>        | Homeobox protein Hox-B7                                           | Transcription factor          | Down       |
| †ICAM1 <sup>a,c,d</sup>     | Intercellular adhesion molecule 1                                 | Generic receptor              | Up         |
| †IDO1 <sup>a,b</sup>        | Indoleamine 2,3-dioxygenase 1                                     | Generic enzyme                | Up         |
| ≠†IFNGR1 <sup>a</sup>       | Interferon gamma receptor 1                                       | Generic receptor              | Up         |
| ≠†IFNGR2 <sup>a</sup>       | Interferon gamma receptor 2                                       | Generic receptor              | Up         |
| †IL1B <sup>a,b,c,d</sup>    | Interleukin-1 beta                                                | Receptor ligand               | Up         |
| †IL6 <sup>a,b,c,d</sup>     | Interleukin-6                                                     | Receptor ligand               | Up         |
| IL10RA <sup>b</sup>         | Interleukin-10 receptor subunit alpha                             | Generic receptor              | Up         |
| †IRF1 <sup>a</sup>          | Interferon regulatory factor 1                                    | Transcription factor          | Up         |
| †ITGA4 <sup>a</sup>         | Integrin alpha-4                                                  | Generic receptor              | Up         |
| †KDM6B <sup>b</sup>         | Lysine-specific demethylase 6B                                    | Generic enzyme                | Up         |
| †KLF6 <sup>a</sup>          | Krueppel-like factor 6                                            | Transcription factor          | Up         |
| ≠KLK3 <sup>b,f</sup>        | Prostate-specific antigen                                         | Generic protease              | Up         |
| †LAMB3 <sup>c</sup>         | Laminin subunit beta-3                                            | Receptor ligand               | Up         |
| †LAMC2 <sup>c</sup>         | Laminin subunit gamma-2                                           | Receptor ligand               | Up         |

|                            |                                                             |                               |      |
|----------------------------|-------------------------------------------------------------|-------------------------------|------|
| †LILRB4 <sup>b</sup>       | Leukocyte immunoglobulin-like receptor subfamily B member 4 | Generic receptor              | Down |
| †MS4A2 <sup>b</sup>        | High affinity immunoglobulin epsilon receptor subunit beta  | Generic receptor              | Up   |
| †MTMR7 <sup>a</sup>        | Myotubularin-related protein 7                              | Protein phosphatase           | Up   |
| MYB <sup>c</sup>           | Transcriptional activator Myb                               | Transcription factor          | Up   |
| †NAB1 <sup>a</sup>         | NGFI-A-binding protein 1                                    | Transcription factor          | Up   |
| †NCOA7 <sup>a</sup>        | Nuclear receptor coactivator 7                              | Generic binding protein       | Up   |
| †NFIB <sup>a</sup>         | Nuclear factor 1 B-type                                     | Transcription factor          | Down |
| †NFKB1 <sup>a</sup>        | Nuclear factor NF-kappa-B p105 subunit                      | Transcription factor          | Up   |
| †NINJ1 <sup>a,b</sup>      | Ninjurin-1                                                  | Generic binding protein       | Up   |
| †NNMT <sup>b,h</sup>       | Nicotinamide N-methyltransferase                            | Generic enzyme                | Up   |
| †NR4A3 <sup>b</sup>        | Nuclear receptor subfamily 4 group A member 3               | Transcription factor          | Up   |
| †NTN1 <sup>a</sup>         | Netrin-1                                                    | Receptor ligand               | Up   |
| OR10H1 <sup>c</sup>        | Olfactory receptor 10H1                                     | GPCR                          | Up   |
| OR1F1 <sup>c</sup>         | Olfactory receptor 1F1                                      | GPCR                          | Up   |
| OR2K2 <sup>c</sup>         | Olfactory receptor 2K2                                      | GPCR                          | Down |
| OR2M2 <sup>c</sup>         | Olfactory receptor 2M2                                      | GPCR                          | Up   |
| OR5L1 <sup>c</sup>         | Olfactory receptor 5L1                                      | GPCR                          | Down |
| OR5M11 <sup>c</sup>        | Olfactory receptor 5M11                                     | GPCR                          | Up   |
| OR5P2 <sup>c</sup>         | Olfactory receptor 5P2                                      | GPCR                          | Up   |
| *OR9G4 <sup>c</sup>        | Olfactory receptor 9G4                                      | GPCR                          | Down |
| OXTR <sup>a,b,c</sup>      | Oxytocin receptor                                           | GPCR                          | Up   |
| †PDE5A <sup>a</sup>        | cGMP-specific 3',5'-cyclic phosphodiesterase                | Generic enzyme                | Up   |
| †PDGFRA <sup>a,b,d</sup>   | Platelet-derived growth factor receptor alpha               | Receptor with enzyme activity | Up   |
| †PDLIM4 <sup>b</sup>       | PDZ and LIM domain protein 4                                | Generic binding protein       | Up   |
| †PEG10 <sup>a</sup>        | Retrotransposon-derived protein PEG10                       | Generic binding protein       | Up   |
| †PGR <sup>a</sup>          | Progesterone receptor                                       | Transcription factor          | Up   |
| ≠†PLA2G4A <sup>a,b,g</sup> | Cytosolic phospholipase A2                                  | Generic phospholipase         | Up   |
| †PTGS2 <sup>a,b,d</sup>    | Prostaglandin G/H synthase 2                                | Generic enzyme                | Up   |
| †REL <sup>a</sup>          | Proto-oncogene c-Rel                                        | Transcription factor          | Up   |
| †RELB <sup>a</sup>         | Transcription factor RelB                                   | Transcription factor          | Up   |
| ≠RESP18 <sup>a</sup>       | Regulated endocrine-specific protein 18                     | Generic protein               | Down |
| †SAT1 <sup>b</sup>         | Diamine acetyltransferase 1                                 | Generic enzyme                | Up   |
| †SDC4 <sup>a,b</sup>       | Syndecan-4                                                  | Generic receptor              | Up   |
| SLC22A2 <sup>e</sup>       | Solute carrier family 22 member 2                           | Transporter                   | Down |
| SLC22A24 <sup>e</sup>      | Solute carrier family 22 member 24                          | Transporter                   | Up   |
| SLC6A4 <sup>e</sup>        | Sodium-dependent serotonin transporter                      | Transporter                   | Up   |
| †SLC7A2 <sup>e</sup>       | Cationic amino acid transporter 2                           | Transporter                   | Up   |
| †SLCO4A1 <sup>e</sup>      | Solute carrier organic anion transporter family member 4A1  | Transporter                   | Up   |
| †SOCS1 <sup>a</sup>        | Suppressor of cytokine signaling 1                          | Generic binding protein       | Up   |
| †SOD2 <sup>a</sup>         | Superoxide dismutase [Mn], mitochondrial                    | Generic enzyme                | Up   |
| †STAT5A <sup>a</sup>       | Signal transducer and activator of transcription 5A         | Transcription factor          | Up   |
| †STC2 <sup>a</sup>         | Stanniocalcin-2                                             | Generic binding protein       | Up   |
| †SYT9 <sup>a</sup>         | Synaptotagmin-9                                             | Generic receptor              | Up   |
| TFAP2A <sup>d</sup>        | Transcription factor AP-2-alpha                             | Transcription factor          | Up   |
| ≠†TGFB3 <sup>a,b</sup>     | Transforming growth factor beta-3 proprotein                | Receptor ligand               | Up   |
| †TLR2 <sup>a</sup>         | Toll-like receptor 2                                        | Generic receptor              | Up   |
| †TNF <sup>a,b,c,d</sup>    | Tumor necrosis factor                                       | Receptor ligand               | Up   |
| †TNFAIP2 <sup>b</sup>      | Tumor necrosis factor alpha-induced protein 2               | Generic protein               | Up   |
| ≠†TNFRSF9 <sup>b</sup>     | Tumor necrosis factor receptor superfamily member 9         | Generic receptor              | Up   |
| †TNFSF10 <sup>f</sup>      | Tumor necrosis factor ligand superfamily member 10          | Receptor ligand               | Up   |
| †VCAM1 <sup>a</sup>        | Vascular cell adhesion protein 1                            | Generic receptor              | Up   |
| ≠†VEGFA <sup>b</sup>       | Vascular endothelial growth factor A                        | Receptor ligand               | Up   |
| WNT7B <sup>a</sup>         | Protein Wnt-7b                                              | Receptor ligand               | Up   |

|  |                                                        |  |  |
|--|--------------------------------------------------------|--|--|
|  | WW domain-containing transcription regulator protein 1 |  |  |
|--|--------------------------------------------------------|--|--|

Genes regulated in AhR mediated regulation\_heart<sup>a</sup>

Genes regulated in LXR mediated regulation\_heart<sup>b</sup>

Genes regulated in PXR mediated regulation\_heart<sup>c</sup>

Genes regulated in FXR mediated regulation\_heart<sup>d</sup>

Genes regulated in Xenobiotic Metabolism. Phase III\_heart<sup>e</sup>

Genes regulated in CAR mediated regulation\_heart<sup>f</sup>

Genes regulated in Xenobiotic Metabolism. Phase I\_heart<sup>g</sup>

Genes regulated in Xenobiotic Metabolism. Phase II\_heart<sup>h</sup>

\*similarly regulated across Wnt5A, Wnt5A+IL-1, and IL-1<sup>s</sup> transcriptomes

≠regulated only in Wnt5A+IL-1 but not in Wnt5A or IL-1<sup>s</sup> transcriptomes

<sup>†</sup>Protein expression verified in normal human myocardium as shown in The Human Protein Atlas database (accessed on 03.08.2020)

<sup>s</sup>Genes of Drug and xenobiotic metabolism pathways most significantly ( $P < 0.05$ ) regulated by 4 h IL-1 $\beta$  treatment in HCAEC (Refer Supplementary Figure 1). Genes were identified by reanalysing data published in Skaria, T., Bachli, E., and Schoedon, G. (2019). *Gene Ontology Analysis for Drug Targets of the Whole Genome Transcriptome of Human Vascular Endothelial Cells in Response to Proinflammatory IL-1*. *Frontiers in Pharmacology* 10. The purpose of reanalysing data from above-said study was to identify the genes of myocardial drug and xenobiotic metabolism pathways regulated by 4 h IL-1 $\beta$  treatment (which was not contained in previous study) that served as an additional positive control for comparing the effects of Wnt5A/ IL-1 $\beta$  combination treatment with sole Wnt5A treatment in HCAEC.

Supplementary Figure 1

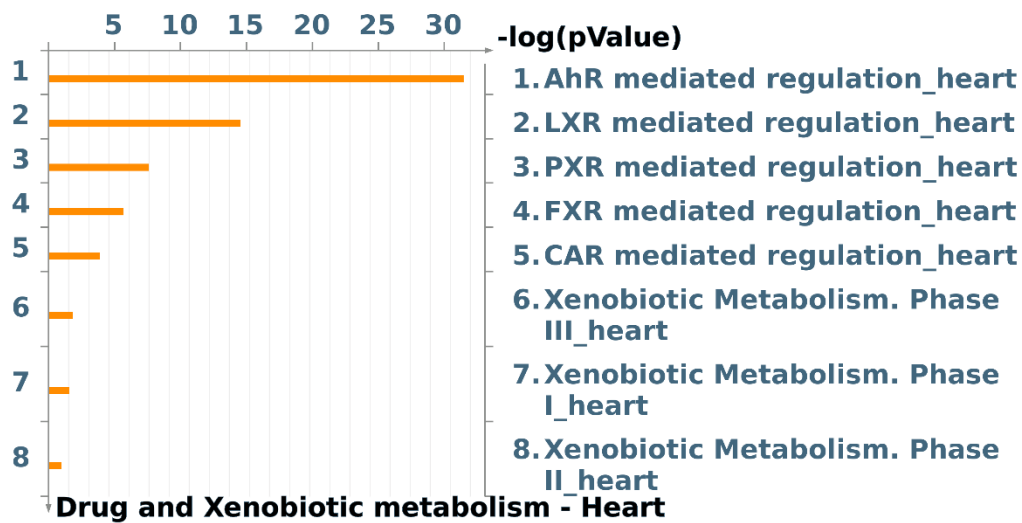

Supplementary Figure 1. Drug and xenobiotic metabolism pathways most significantly ( $P < 0.05$ ) regulated by 4 h IL-1 $\beta$  treatment in HCAEC. Pathways represented as histograms are ranked by the  $-\log$  value (P value). This figure is generated by reanalysing data published in Skaria, T., Bachli, E., and Schoedon, G. (2019). *Gene Ontology Analysis for Drug Targets of the Whole Genome Transcriptome of Human Vascular Endothelial Cells in Response to Proinflammatory IL-1*. *Frontiers in Pharmacology* 10. The purpose of reanalysing data from above-said study was to identify the myocardial drug and xenobiotic metabolism pathways regulated by 4 h IL-1 $\beta$  treatment (which was not contained in previous study) that served as an additional positive control for comparing the effects of Wnt5A/ IL-1 $\beta$  combination treatment with sole Wnt5A treatment in HCAEC.
